# Supplementary material
Source: MDPI journal article supplement (https://www.mdpi.com/2073-4395/14/5/972)
Supplement: s1 [file s1 › agronomy-2953785-supplementary.pdf]

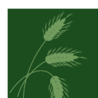

**Table S1.** Weekly rainfall at two locations in northern Ghana during 2020 and 2021.

| Interval after planting | Rainfall      |         |         |               |         |         |
|-------------------------|---------------|---------|---------|---------------|---------|---------|
|                         | Nyankpala     |         |         | Tanina        |         |         |
|                         | Planting date |         |         | Planting date |         |         |
| Days                    | mm            |         |         |               |         |         |
| 2020                    | May 20        | June 3  | June 17 | June 17       | July 1  | July 15 |
| 0–14                    | 35            | 136.7   | 117.1   | 37.6          | 79.1    | 37.6    |
| 15–28                   | 136.7         | 117.1   | 202.6   | 78.3          | 37.6    | 39.7    |
| 29–42                   | 117.1         | 202.6   | 105.6   | 38.4          | 169.6   | 43.5    |
| 43–56                   | 202.6         | 105.6   | 31.8    | 39.7          | 43.5    | 152.4   |
| 57–70                   | 105.6         | 31.8    | 179.6   | 43.5          | 139.3   | 203.4   |
| 71–84                   | 31.8          | 179.6   | 147.2   | 127.9         | 216.5   | 81.1    |
| 85–98                   | 131.5         | 147.2   | 69.5    | 214.9         | 81.1    | 57.4    |
| 99–112                  | 160.4         | 69.5    | 151.6   | 90.9          | 57.4    | 0.0     |
| 113–126                 | 104.4         | 151.6   | 79.3    | 60.6          | 0.0     | 0.0     |
| 2021                    | May 28        | June 18 | July 2  | May 27        | June 12 | June 24 |
| 0–14                    | 104.6         | 86.4    | 63.8    | 69.3          | 16.3    | 134.3   |
| 15–28                   | 95.9          | 63.8    | 29      | 46.0          | 135.0   | 61.2    |
| 29–42                   | 200.5         | 29      | 118.1   | 134.3         | 63.9    | 129.0   |
| 43–56                   | 77.4          | 118.1   | 117.4   | 61.2          | 131.5   | 142.6   |
| 57–70                   | 37.1          | 117.4   | 167.1   | 129.0         | 145.9   | 156.0   |
| 71–84                   | 164.7         | 167.1   | 25.7    | 142.6         | 178.9   | 178.8   |
| 85–98                   | 179.2         | 24.9    | 49.4    | 156.0         | 148.8   | 31.1    |
| 99–112                  | 57.5          | 50.2    | 27.5    | 178.8         | 36.5    | 50.6    |
| 113–126                 | 29.2          | 27.5    | 6.3     | 31.1          | 43.1    | 68.0    |

Treatment factors included three levels of planting date (referred to as early, mid).

**Table S2.** Planting dates at three locations in northern Ghana during 2020 and 2021.

| Planting schedule in the cropping cycle | Planting date |           |         |         |           |         |
|-----------------------------------------|---------------|-----------|---------|---------|-----------|---------|
|                                         | 2020          |           |         | 2021    |           |         |
|                                         | Fumesua       | Nyankpala | Tanina  | Fumesua | Nyankpala | Tanina  |
| Early                                   | May 28        | May 20    | June 17 | June 11 | May 28    | May 27  |
| Mid                                     | June 18       | June 3    | July 1  | June 26 | June 18   | June 12 |
| Late                                    | July 2        | June 17   | July 15 | July 12 | July 2    | June 24 |

**Table S3.** Sample calculation of economic return associated with harvest, shelling, and production costs.

| Peanut yield<br>(kg/ha) |         | Cost of production inputs (\$/ha)          |                                     |                                    |                           |            |                          |                       |            |                                      |
|-------------------------|---------|--------------------------------------------|-------------------------------------|------------------------------------|---------------------------|------------|--------------------------|-----------------------|------------|--------------------------------------|
|                         |         | Gross economic return (\$/ha) <sup>a</sup> | Harvest cost (\$0.075/kg unshelled) | Shelling cost (\$0.075/kg shelled) | Base cost production cost | Fertilizer | Improved pest management |                       |            | Economic return (\$/ha) <sup>b</sup> |
| Un-shelled              | Shelled |                                            |                                     |                                    |                           |            | Additional weeding       | Local potassium soaps | Total cost |                                      |
| 2,000                   | 1,300   | 1,560                                      | 150                                 | 98                                 | 145                       | 0          | 0                        | 0                     | 393        | 1,167                                |
| 2,000                   | 1,300   | 1,560                                      | 150                                 | 98                                 | 145                       | 0          | 50                       | 10                    | 453        | 1,107                                |

|       |       |       |     |    |     |     |    |    |     |       |
|-------|-------|-------|-----|----|-----|-----|----|----|-----|-------|
| 2,000 | 1,300 | 1,560 | 150 | 98 | 145 | 148 | 0  | 0  | 541 | 1,019 |
| 2,000 | 1,300 | 1,560 | 150 | 98 | 145 | 148 | 50 | 10 | 601 | 959   |

<sup>a</sup>Price set at \$1.2/kg shelled peanut at a shell out rate of 65%. <sup>b</sup>Estimated economic return calculated by subtracting total cost associated with harvest and production from gross economic return.

**Table S4.** Analysis of variance for peanut yield, net return, pest reaction, and pod damage as influenced by planting date, pest management practice, cultivar, applied fertilizer, and harvest date.<sup>a</sup>

| Source of variation           | Pod yield | Net re-turn | Millipede | White grub | Wireworm | Termites | Canopy de-foliation | Aphid <sup>b</sup> | Rosette <sup>c</sup> | Scarred pods | Penetrated pods |
|-------------------------------|-----------|-------------|-----------|------------|----------|----------|---------------------|--------------------|----------------------|--------------|-----------------|
| Planting Date (PD)            | *         | *           | *         | *          | NS       | NS       | *                   | NS                 | *                    | *            | NS              |
| Pest management practice (PM) | *         | *           | *         | *          | *        | *        | *                   | *                  | *                    | *            | *               |
| Cultivar (CU)                 | *         | *           | *         | *          | *        | *        | *                   | *                  | *                    | *            | *               |
| Fertilizer (FE)               | *         | *           | *         | *          | *        | *        | *                   | *                  | *                    | *            | *               |
| Harvest Date (HD)             | NS        | NS          | *         | *          | *        | *        | *                   | NS                 | NS                   | *            | *               |
| PD × CU                       | NS        | NS          | NS        | *          | NS       | NS       | *                   | NS                 | NS                   | *            | NS              |
| PD × FE                       | *         | *           | NS        | NS         | NS       | NS       | *                   | *                  | NS                   | *            | NS              |
| CU × PM                       | NS        | NS          | *         | *          | *        | *        | NS                  | *                  | *                    | *            | *               |
| FE × PM                       | NS        | NS          | *         | *          | *        | *        | *                   | *                  | *                    | *            | *               |
| CU × FE                       | *         | *           | *         | *          | *        | *        | *                   | *                  | *                    | *            | *               |
| PD × HD                       | NS        | NS          | NS        | NS         | NS       | NS       | *                   | NS                 | NS                   | NS           | NS              |
| PM × HD                       | NS        | NS          | NS        | *          | *        | *        | *                   | NS                 | NS                   | *            | *               |
| CU × HD                       | NS        | NS          | NS        | *          | NS       | *        | *                   | NS                 | NS                   | *            | *               |
| FE × HD                       | NS        | NS          | NS        | NS         | NS       | *        | NS                  | NS                 | NS                   | *            | *               |
| CU × FE × PM                  | NS        | NS          | *         | NS         | NS       | *        | *                   | NS                 | *                    | *            | *               |
| PD × CU × PM                  | NS        | NS          | NS        | NS         | NS       | NS       | *                   | NS                 | NS                   | NS           | NS              |
| PD × FE × PM                  | NS        | NS          | NS        | NS         | NS       | NS       | *                   | *                  | NS                   | *            | NS              |
| PD × CU × FE                  | NS        | NS          | NS        | NS         | NS       | NS       | NS                  | NS                 | NS                   | *            | NS              |
| CU × FE × HD                  | NS        | NS          | NS        | NS         | NS       | *        | *                   | NS                 | NS                   | *            | *               |
| PD × CU × HD                  | NS        | NS          | NS        | NS         | NS       | NS       | *                   | NS                 | NS                   | NS           | NS              |
| PD × FE × HD                  | NS        | NS          | NS        | NS         | NS       | NS       | *                   | NS                 | NS                   | NS           | NS              |
| CU × PM × HD                  | NS        | NS          | NS        | NS         | NS       | NS       | NS                  | NS                 | NS                   | *            | NS              |
| FE × PM × HD                  | NS        | NS          | NS        | NS         | NS       | *        | NS                  | NS                 | NS                   | *            | *               |
| PD × CU × FE × PM             | NS        | NS          | NS        | NS         | NS       | NS       | *                   | NS                 | *                    | NS           | NS              |

|                              |    |    |    |    |    |    |   |    |    |    |    |
|------------------------------|----|----|----|----|----|----|---|----|----|----|----|
| CU × FE ×<br>PM × HD         | NS | NS | NS | NS | NS | NS | * | NS | NS | *  | NS |
| PD × CU ×<br>PM × HD         | NS | NS | NS | NS | NS | NS | * | NS | NS | NS | NS |
| PD × CU ×<br>FE × HD         | NS | NS | NS | NS | NS | NS | * | NS | NS | NS | NS |
| PD × CU ×<br>FE × PM ×<br>HD | NS | NS | NS | NS | NS | NS | * | NS | NS | NS | NS |

<sup>a</sup>Data are pooled over 6 site-year combinations in 2019 and 2020. <sup>b</sup>Ordinal scale of 0 to 9 where: 0 = no aphids present/no infestation; 1 = early instar nymphs present/few individual aphids (0–100); 3 = early and late instar nymphs and adults spread on most stems/few isolated colonies (101–300); 5 = aphids spread on all stems and new trifoliolate leaves/several small colonies (301–600); 7 = high density of aphids on all stems and 50–80% trifoliolate leaves covered with aphids/large isolated colonies (601–1000); and 9 = plants overwhelmed by aphids with > 80% covered/large contentious colonies (> 1000). <sup>c</sup>Ordinal scale where: 1 = resistant with no symptom; 2 = very slight leaf symptoms; 3 = slight leaf symptoms but still negligible; 4 = 50% symptoms on leaves; 5 = all leaves with symptoms of chlorosis; 6 = 25% stunting; 7 = 50% stunting; 8 = > 50% stunting with few pods; and 9 = > 50% stunting and no pods.
